# Supplementary material for: Role of Language-Related Functional Connectivity in Patients with Benign Childhood Epilepsy with Centrotemporal Spikes
Source: PubMed Central journal article supplement — J Clin Neurol. 2017 Dec 27;14(1):48–57. doi: 10.3988/jcn.2018.14.1.48 (PMC5765256; doi:10.3988/jcn.2018.14.1.48), 2017-12-27
Supplement: jcn-14-48-s001.pdf [file jcn-14-48-s001.pdf]

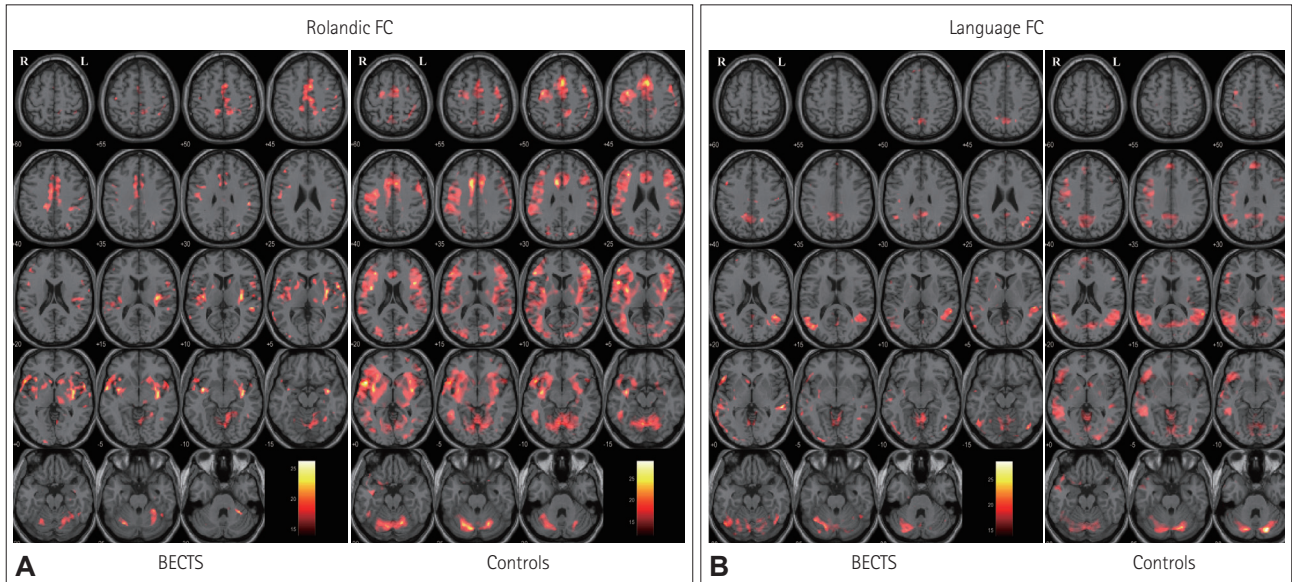

**Supplementary Fig. 1.** Within-group maps of the positive Rolandic and language FC in the BECTS patient and control groups. A: In the patient group, maps of the Rolandic FC exhibited positive correlation to more-restricted regions, including the bilateral superior temporal gyri and the right claustrum. In the control group, the Rolandic area exhibited strong positive FC correlations with distributed areas, including the left superior temporal gyrus, left middle frontal gyrus, and right superior frontal gyrus. B: In the patient group, maps of the language FC exhibited positive correlation to more-restricted regions, including the bilateral middle temporal gyri and the right occipital fusiform gyrus. In the control group, the language area exhibited strong positive FC correlations with distributed areas, including the left supramarginal gyrus and bilateral cerebellar pyramids. Statistically significant voxel distributions in specific brain areas are summarized in Supplementary Table 1 (in the online-only Data Supplement). BECTS: benign childhood epilepsy with centrotemporal spikes, FC: functional connectivity.
