# Supplementary material for: Role of Language-Related Functional Connectivity in Patients with Benign Childhood Epilepsy with Centrotemporal Spikes
Source: PubMed Central journal article supplement — J Clin Neurol. 2017 Dec 27;14(1):48–57. doi: 10.3988/jcn.2018.14.1.48 (PMC5765256; doi:10.3988/jcn.2018.14.1.48), 2017-12-27
Supplement: jcn-14-48-s002.pdf [file jcn-14-48-s002.pdf]

**Supplementary Table 1.** Regions exhibiting positive seed-based functional connectivity within the benign childhood epilepsy with centrotemporal spikes patient and control groups

| Seed region   | k $\epsilon$ | Cluster level | Peak level    | T score | Coordinate (mm) |     |     | Regions                                  |
|---------------|--------------|---------------|---------------|---------|-----------------|-----|-----|------------------------------------------|
|               |              | $p$ (FDR-cor) | $p$ (FDR-cor) |         | X               | Y   | Z   |                                          |
| Rolandic area |              |               |               |         |                 |     |     |                                          |
| PT            | 1,561,550    | <0.001*       | <0.001*       | 26.458  | -36             | 0   | -12 | Left superior temporal gyrus             |
|               |              |               |               | 23.920  | 38              | -8  | -6  | Right claustrum                          |
|               |              |               |               | 23.785  | 58              | 4   | 2   | Right superior temporal gyrus            |
| HC            | 1,775,450    | <0.001*       | <0.001*       | 29.182  | -50             | 12  | 2   | Left superior temporal gyrus             |
|               |              |               |               | 25.734  | -32             | 28  | 22  | Left middle frontal gyrus                |
|               |              |               |               | 25.278  | 4               | 14  | 48  | Right superior frontal gyrus             |
| Language area |              |               |               |         |                 |     |     |                                          |
| PT            | 1,495,510    | <0.001*       | <0.001*       | 28.779  | 56              | -34 | 0   | Right middle temporal gyrus              |
|               |              |               |               | 25.751  | 44              | -74 | -12 | Right occipital fusiform gyrus           |
|               |              |               |               | 24.487  | -42             | -70 | 16  | Left middle temporal gyrus               |
| HC            | 1,746,470    | <0.001*       | <0.001*       | 31.509  | 22              | -76 | -30 | Right cerebellar posterior lobe, pyramis |
|               |              |               |               | 27.386  | -58             | -52 | 22  | Left temporal supramarginal gyrus        |
|               |              |               |               | 23.073  | -16             | -76 | -30 | Left cerebellar posterior lobe, pyramis  |

\*Statistical significance at FDR-cor  $p < 0.05$ .

FDR-cor: corrected false discovery rate, HC: healthy controls, k $\epsilon$ : cluster, PT: patients.
