# Supplementary material for: Role of Language-Related Functional Connectivity in Patients with Benign Childhood Epilepsy with Centrotemporal Spikes
Source: PubMed Central journal article supplement — J Clin Neurol. 2017 Dec 27;14(1):48–57. doi: 10.3988/jcn.2018.14.1.48 (PMC5765256; doi:10.3988/jcn.2018.14.1.48), 2017-12-27
Supplement: jcn-14-48-s004.pdf [file jcn-14-48-s004.pdf]

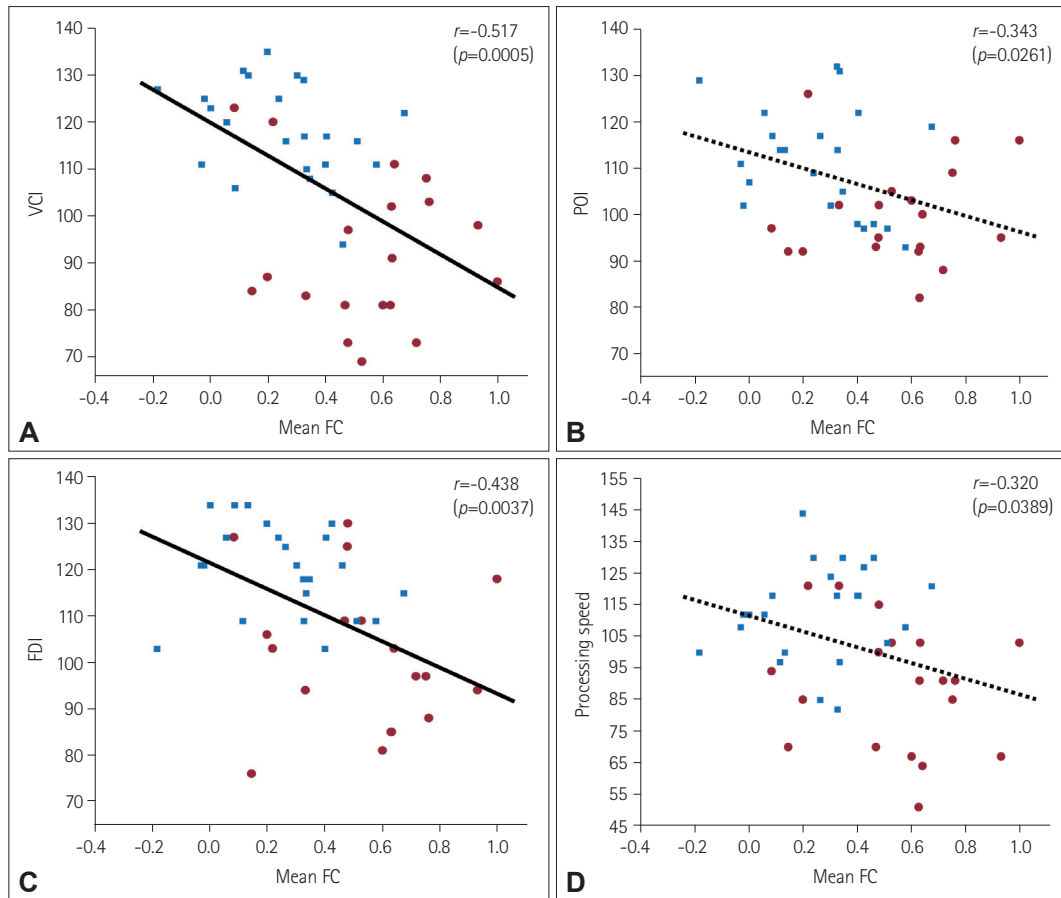

**Supplementary Fig. 3.** Relationship between Korean version of the Wechsler Intelligence Scale for Children-III factorial subscales and language FC. Language FC to voxels in the left inferior temporal gyrus, which was greater in the patient group (red dots) than in the control group (blue squares), was correlated with greater impairment of cognitive performance as measured by (A) VCI ( $r = -0.517$ ,  $p = 0.0005$ ), (B) POI ( $r = -0.343$ ,  $p = 0.0261$ ), (C) FDI ( $r = -0.438$ ,  $p = 0.0037$ ), and (D) processing speed ( $r = -0.320$ ,  $p = 0.0389$ ). The cutoff for statistical significance was a corrected  $p$  of 0.0071. FC: functional connectivity, FDI: freedom from distractibility index, POI: perceptual organization index, VCI: verbal comprehension index.
